# Supplementary material for: Marfan Syndrome: Enhanced Diagnostic Tools and Follow-up Management Strategies
Source: MDPI journal article supplement (doi:10.3390/diagnostics13132284), 2023-07-05
Supplement: s1 [file s1]

**Supplementary Table S1.** Genetically related disorders in MFS differential diagnosis due to mutations in FBN1.

| <b>Disorder</b>                              | <b>OMIM ID</b>               | <b>Mode of Inheritance</b> | <b>Gene/Protein Mutation Site</b>                                                                                                                                                   |
|----------------------------------------------|------------------------------|----------------------------|-------------------------------------------------------------------------------------------------------------------------------------------------------------------------------------|
| Neonatal Marfan Syndrome                     | No OMIM ID<br>(ORPHA:284979) | Autosomal Dominant         | - Variants between exons 23 to 32 (known as “the neonatal region”)                                                                                                                  |
| Autosomal Dominant Weill-Marchesani Syndrome | #608328                      | Autosomal Dominant         | - substitutions and amino acid deletion affecting domain TB5<br>- substitutions in the first hybrid domain<br>- deletion of exons 9–11 resulting in the loss of domains TB1 to EGF4 |
| Acromicric Dysplasia                         | #102370                      | Autosomal Dominant         | - Variants in exon 41 or 42, affecting domain TB5                                                                                                                                   |
| Geleophysic dysplasia 2                      | #614185                      | Autosomal Dominant         | - Variants in exon 41 or 42, affecting domain TB5                                                                                                                                   |
| Stiff Skin Syndrome                          | #184900                      | Autosomal Dominant         | - Variants affect domain TB4 which contains the only integrin-binding RGD motif of Fibrillin-1                                                                                      |
| Marfanoid Progeroid Lipodystrophy Syndrome   | #616914                      | Autosomal Dominant         | - Variants in exon 64 leading to a premature stop-codon formation in the C-terminus domain                                                                                          |
| MASS Syndrome                                | #604308                      | Autosomal Dominant         | - Not defined                                                                                                                                                                       |
| Ectopia lentis, familial                     | #129600                      | Autosomal Dominant         | - missense variants usually involving a cysteine residue                                                                                                                            |

**Supplementary Table S2.** Genetically related disorders in MFS differential diagnosis due to mutations in other genes.

| <b>Disorder</b>                                            | <b>OMIM Number</b>                                                  | <b>Gene</b>                                                                                              | <b>Mode of Inheritance</b>       |
|------------------------------------------------------------|---------------------------------------------------------------------|----------------------------------------------------------------------------------------------------------|----------------------------------|
| Loeys-Dietz syndrome                                       | #609192,<br>#610168,<br>#619656,<br>#613795,<br>#614816,<br>#615582 | <i>TGFBR1</i> ,<br><i>TGFBR2</i> ,<br><i>SMAD2</i> ,<br><i>SMAD3</i> ,<br><i>TGFB2</i> ,<br><i>TGFB3</i> | Autosomal Dominant               |
| Beals syndrome<br>(Congenital contractural arachnodactyly) | #121050                                                             | <i>FBN2</i>                                                                                              | Autosomal Dominant               |
| Meester-Loeys syndrome                                     | #300989                                                             | <i>BGN</i>                                                                                               | X-linked                         |
| Ehlers-Danlos syndrome (EDS), classic type                 | #130000,<br>#130010                                                 | <i>COL5A1</i> ,<br><i>COL5A2</i>                                                                         | Autosomal Dominant               |
| EDS, Cardiac-valvular type                                 | #225320                                                             | <i>COL1A2</i>                                                                                            | Autosomal Recessive              |
| EDS, Vascular type                                         | #130050                                                             | <i>COL3A1</i>                                                                                            | Autosomal Dominant               |
| Hypermobile EDS                                            | %130020                                                             | <i>Unknown</i>                                                                                           | Assumed to be Autosomal Dominant |
| EDS, Kyphoscoliotic form                                   | #225400                                                             | <i>PLOD1</i> ,<br><i>FKBP14</i>                                                                          | Autosomal Recessive              |
| Brittle Cornea Syndrome                                    | #229200,<br>#614170                                                 | <i>ZNF469</i> ,<br><i>PRDM</i>                                                                           | Autosomal Recessive              |
| Arterial tortuosity syndrome                               | #208050                                                             | <i>SLC2A10</i>                                                                                           | Autosomal Recessive              |
| Classical Homocystinuria                                   | #236200                                                             | <i>CBS</i>                                                                                               | Autosomal Recessive              |
| Stickler syndrome type I                                   | #108300                                                             | <i>COL2A1</i>                                                                                            | Autosomal Dominant               |
| Autosomal dominant polycystic kidney disease               | #173900,<br>#173910                                                 | <i>PKD1</i> ,<br><i>PKD2</i>                                                                             | Autosomal Dominant               |

|                                   |          |                            |                                     |
|-----------------------------------|----------|----------------------------|-------------------------------------|
| Chromosome<br>16p13.3 duplication | #613458  | <i>MYH11</i>               | Autosomal Dominant (isolated cases) |
| Fragile X-linked syndrome         | # 300624 | <i>FMRI</i>                | X-linked recessive                  |
| Lujan-Fryns syndrome              | 309520   | <i>MED12</i>               | X-linked recessive                  |
| Heritable Thoracic Aortic Disease | %607086  | <i>Many genes involved</i> |                                     |
